# Supplementary material for: Fatigue during treatment for hepatitis C virus: results of self-reported fatigue severity in two Phase IIb studies of simeprevir treatment in patients with hepatitis C virus genotype 1 infection
Source: PubMed Central journal article supplement (PMC4162924; doi:10.1186/1471-2334-14-465), 2014-08-26
Supplement: 12879_2013_3786_MOESM1_ESM.pdf [file 12879_2013_3786_MOESM1_ESM.pdf]

Ethics approval for PILLAR received from the following 57 Ethics Review Committees  
between 30 March 2009 and 28 September 2009

| <b>Ethics Review Committee</b>                                                                                                                   | <b>Investigators</b>        |
|--------------------------------------------------------------------------------------------------------------------------------------------------|-----------------------------|
| Comite De Etica De Protocolos De Investigacion<br>Gascón 450<br>Buenos Aires C1181ACH<br>Argentina                                               | GALDAME, Omar Andres        |
| Comite De Bioetica Del Hospital Francisco J Muniz<br>Uspallata 2272<br>Buenos Aires C1282AEN<br>Argentina                                        | FAINBOIM, Hugo              |
| Comite De Docencia Institucional<br>Billinghurst 1677 3 Piso<br>Buenos Aires C1425DTG<br>Argentina                                               | TERG, Ruben                 |
| Comite Institucional de Evaluacion Universidad<br>Austral<br>Avenida Juan Domingo Peron 1500<br>DERQUI - PILAR<br>Buenos Aires 1635<br>Argentina | SILVA, Marcelo Oscar        |
| Comite De Bioetica Para Investigacion Clinica<br>Avenida Belgrano 1746<br>Buenos Aires 1093<br>Argentina                                         | VILLAMIL, Federico          |
| Sswahs Ethics Review Committee<br>Hospital Road<br>Concord NSW 2139<br>Australia                                                                 | DORE, Greg<br>GEORGE, Jacob |
| Human Research Ethics Committee<br>St Vincent's Hospital<br>Victoria Pde<br>Fitzroy North 3065<br>Australia                                      | DESMOND, Paul               |
| Alfred Human Research & Ethics Committee<br>Alfred Hospital<br>Commercial Rd<br>Melbourne VIC 3004<br>Australia                                  | ROBERTS, Stuart             |

Princess Alexandra Hospital HREC  
Ipswich Road -  
Woolloongabba  
Brisbane N/A QLD 4102  
Australia

MACDONALD, Graeme  
LEE, Alice

Ethikkommission d. Med. Universität Wien und des  
Allgemeinen Krankenhauses der Stadt Wien  
Borschkegasse 8B/E 06  
Wien 1090  
Austria

FERENCI, Peter  
LAFERL, Hermann  
GSCHWANTLER, Michael

Commision Biomedicale D Ethique Hospitalsfacultaire  
Avenue Hippocrate Ucl 5514  
Bruxelles 1200  
Belgium

HORSMANS, Yves

Comité voor Medische Ethiek UZA  
Wilrijkstraat 10  
EDEGEM 2650  
Belgium

MICHELSEN, Peter

Commissie Medische Ethiek UZ Gasthuisberg Leuven  
Herestraat 49.  
Leuven 3000  
Belgium

NEVENS, Frederik

Academisch Ziekenhuis Vub Ethische Commissie  
Laarbeeklaan 101  
Brussels 1090  
Belgium

REYNAERT, Hendrik

Ethisch Comité Universitair Ziekenhuis Gent  
De Pintelaan 185  
Gent 9000  
Belgium

VAN VLIERBERGHE, Hans

Commissie Voor Ethiek AZ St. Jan AV  
Ruddershove 10  
Brugge 8000  
Belgium

ORLENT, Hans

Comite d'ethique Hospital Erasme  
Route de Lennik 808  
Anderlecht 1070  
Belgium

MORENO, Christophe

H.-Hartziekenhuis Medisch-Ethische Commissie

DECAESTECKER, Jochen

Wilgenstraat 2  
Roeselare 8800  
Belgium

Comite de Etica em Pesquisa da PUCCamp  
Rodovia Dom Pedro I km 136  
Campinas SP  
Brazil

LIMA, Maria Patelli

Comite De Etica Em Pesquisa-Faculdade De Ciencias  
Medicas-Unicamp  
PO Box: 6111  
Campinas SP 13083-970  
Brazil

GONCALES JR, Fernando Lopes

Comite De Etica Em Pesquisa Da Maternidade  
Climerio De Oliveira  
Rua do Limoeiro, 137 Nazaré  
Salvador  
Brazil

PARANA, Raymundo

Comite De Etica Em Pesquisa Do Hospital Sao Rafael  
Av S Rafael 2152  
Salvador  
Brazil

LYRA, Luiz Guilherme

Comite De Etica Em Pesquisa Da FMUSP/HC  
Rua Dr Ovídio Pires De Campos 225- Cerqueira César  
Sao Paulo 05403-010  
Brazil

PESSOA, Mario

McGill University Health Centre Research Ethics Board  
1650, av. Cedar  
Montréal QC H3G 1A4  
Canada

GHALI, Maged Peter

Veritas IRB  
1255 Transcanada Hwy Suite  
310 Dorval  
Montreal QC H9P 2V4  
Canada

CÔTÉ, Pierre

Conjoint Health Research Ethics Board  
3330 Hospital Dr Nw Room 93  
Calgary AB T2N 4N1  
Canada

LEE, Samuel

University Health Network Research Ethics Board

HEATHCOTE, Jenny

700 University  
Toronto ON M5G 1Z5  
Canada

HIRSCHFIELD, Gideon  
SHERMAN, Morris

Den Videnskabsetiske Komite for Region Syddanmark  
Regionshuset Damhaven 12  
Vejle 7100  
Denmark

GERSTOFT, Jan,MD  
CHRISTENSEN, Peer Brehm  
PEDERSEN, Court  
LAURSEN, Alex Lund  
MATHIESEN, Lars  
MOELLER, Axel

CPP Ile De France III - Hopital Tarnier Cochin  
89 rue D'Assas  
Paris N/A 75006  
France

BENHAMOU, Yves  
BRONOWICKI, JeanPierre  
GRANGE, JeanDidier  
HEZODE, Christophe  
LEBRAY, Pascal  
MARCELLIN, Patrick  
TRAN, Albert  
TREPO, Christian  
ZARSKI, Jean Pierre

Landesamt für Gesundheit und Soziales Berlin  
Geschäftsstelle der Ethik-Kommission des Landes Berlin  
Fehrbellinerplatz  
Berlin 10707  
Germany

ARASTÉH, Keikawus  
BERG, Thomas

Ethik-Kommission Der Medizinischen Fakultät Der Universität  
Würzburg  
Institut für Pharmakologie und Toxikologie  
Versbacher Strasse 9  
Würzburg 97087  
Germany

KLINKER, Hartwig,

Ethikkommission Bei Der Landesärztekammer  
Baden-Württemberg  
Jahnstrasse 40  
Stuttgart 70597  
Germany

TREIN, Andreas,

Ethik-Kommission Der Medizinischen Fakultät Der Universität  
Zu Köln  
Gleueler Str. 70  
Geb. 5, Eingang A, Etage 2A,  
Raum 015  
Köln 50931  
Germany

GOESER, Tobias

Ethik-Kommission Der Medizinische Hochschule Hannover  
Carl-Neuberg-Strasse 1  
Hannover 30625  
Germany

MANN, Michael Peter

Ethik-Kommission Der Ärztekammer Nordrhein  
Tersteegenstr 9  
Düsseldorf 40474  
Germany

MAUSS, Stefan

Ethik-Kommission Der Albert Ludwigs Universität Freiburg  
Engelbergerstr 21  
Freiburg 79106  
Germany

RASENACK, Jens

Ethik-Kommission des Fachbereichs Medizin der  
Johann-Wolfgang-Goethe Universität  
Theodor-Stern-Kai 7  
HAUS 1  
Frankfurt 60590  
Germany

ZEUZEM, Stefan

Ethik-Kommission der Ärztekammer Hamburg  
Humboldtstr. 67a  
22083 Hamburg  
Germany

BUGGISCH, Peter  
STELLBRINK, Hans Jürgen

Multi Region Ethics Committee  
133 Molesworth Street  
Wellington  
New Zealand

STEDMAN, Catherine  
DICKSON, Graeme  
GANE, Ed  
WEILERT, Frank

Reg. komite med. Og helsefaglig forskningsetikk  
Sør-Øst-Norge (REK Sør-Øst)  
**Post Address:** PO box 1130,  
Blindern, 0318 Oslo, Norway  
**Visit address:** Gullhaug torg  
4a, 0484 Oslo, Norway

BRUUN, Trond  
VON DER LIPPE, Bent  
KONOPSKI, Zbigniew  
BLOCK HELLMUM, Kjell  
FLORHOLMEN, Jon  
LANGELAND, Nina

Komisja Bioetyczna Uniwersytetu Medycznego w Białymstoku  
Ul Kilinskiego 1  
Białystok 15-089  
Poland

FLISIAK, Robert  
HASSMANNPOZNANSKA, Elzbieta  
HORBAN, Andrzej  
HALOTA, Waldemar  
KRYCZKA, Wieslaw  
JABLKOWSKI, Maciej  
JANCZEWSKA-KAZEK, Ewa

Independent Ethics Committee Of Smolensk Regional Clinical  
Hospital

RAFALSKIY, Vladimir

27 Gagarina Avenue  
Smolensk 214019  
Russia

Independent Ethics Committee Of Moscow  
Regional Clinical Institute Vladimirsky  
61/2 Schepkina Street  
Moscow 129111  
Russia

Interuniversity Ethics Committee And Association Of Medical  
And Pharmaceutical Institute Of Higher Education  
8 Build 2 Trubetskaya Str  
Moscow 119992  
Russia

Independent Interdisciplinary. Committee On Ethical  
Exploration of Clinical Studies  
51 Leningradsky Prospekt  
Moscow 125468  
Russia

Comite Etico De Investigacion Clinica Del Hospital  
Universitari Vall D'Hebron - 2A Planta  
Paseo Vall D'Hebron, 119-129  
Institut De Recerca Hospital Universitari Vall  
D'Hebron  
Barcelona 08035  
Spain

Hospital La Princesa - Comite Etico De  
Investigacion Clinica  
Diego De Leon 62  
Madrid 28006  
Spain

Ec Of Hospital De Valme  
Carretera De Cadiz S/n Km 548 9  
Sevilla N/a 41014  
Spain

CEIC AREA 6 - Hospital Universitario Puerta De  
Hierro De Majadahonda  
C/ Joaquin Rodrigo, 2  
Majadahonda (Madrid) 28222  
Spain

BOGOMOLOV, Pavel

IVASHKIN, Vladimir

KOROCHKINA, Olga  
MOROZOV, Vyacheslav  
NIKITIN, Igor G  
YAKOVLEV, Alexey,  
VORONIN, Evgeniy  
ZAKHAROVA, Natalia

MORENO OTERO, Ricardo  
CALLEJA, Jose Luis  
DIAGO, Moises  
ROMERO, Manuel  
BUTI, Maria

MORENO OTERO, Ricardo

BUTI, Maria  
ROMERO, Manuel

CALLEJA, Jose Luis

CEIC Hospital La Ribera de Alzira  
Corbera  
Alzira VALENCIA 46600  
Spain

DIAGO, Moises

Ochsner Institutional Review Board  
1514 Jefferson Hwy  
Biomedical Research Bldg.  
New Orleans LA 70121  
USA

GIRGRAH, Nigel

IRB Of Cedars-Sinai Medical Center  
8383 Wilshire Blvd  
SUITE 742  
Beverly Hills CA 90211  
USA

POORDAD, Fred

Committee On Human Rights In Research  
Weill Medical College Of Cornell University  
425 E 61St St Rm 301  
New York NY 10021  
USA

JACOBSON, Ira M

Office of Human Research Ethics  
School of Medicine Bldg. #52, CB 7097  
The University of North Carolian at Chapel Hill  
Chapel Hill, NC 27599-7097  
USA

FRIED, Michael

University Of Chicago Office Of Clinical Research  
Section Regulatory Compliance  
5751 S Woodlawn Ave  
McGiffert Hall, 2nd floor  
Chicago IL 60637  
USA

JENSEN, Donald M

Sterling Institutional Review Board  
6300 Powers Ferry Rd, Suite 600-351  
Atlanta GA 30339  
USA

DE JESUS, Edwin  
ETZKORN, Kyle  
JONAS, Mark  
PAMBIANCO, Daniel  
SMITH, Coleman  
TAUNK, Jawahar  
WRUBLE, Lawrence  
YOUNES, Ziad

Ethics Approval for ASPIRE received from the following 54 Ethics Review Committees  
between 17 September 2009 and 24 December 2009

| <b>Ethics Review Committee</b>                                                                                                                | <b>Investigators</b>                                      |
|-----------------------------------------------------------------------------------------------------------------------------------------------|-----------------------------------------------------------|
| Human Research Ethics Committee<br>St Vincent's Hospital<br>Victoria Pde<br>Fitzroy North 3065<br>Australia                                   | DESMOND, Paul                                             |
| Alfred Human Research & Ethics Committee<br>Alfred Hospital<br>Commercial Rd<br>Melbourne VIC 3004<br>Australia                               | ROBERTS, Stuart<br>GEORGE, Jacob                          |
| Princess Alexandra Hospital HREC<br>Ipswich Road -<br>Woolloongabba<br>Brisbane N/A QLD 4102<br>Australia                                     | MACDONALD, Graeme                                         |
| St. Vincent's Ethics Committee<br>390 Victoria Straat<br>St Vincent's Hospital Sydney Ltd<br>Darlinghurst NSW 2010<br>Australia               | DORE, Greg<br>HUGHES, Brian<br>LEE, Alice                 |
| Melbourne Health Research Directorate<br>Royal Melbourne Hospital<br>Grattan Street<br>Parkville - VIC VIC 3050<br>Australia                  | NICOLL, Amanda                                            |
| Ethikkommission d. Med. Universität Wien und des<br>Allgemeinen Krankenhauses der Stadt Wien<br>Borschkegasse 8B/E 06<br>Wien 1090<br>Austria | FERENCI, Peter<br>LAFERL, Hermann<br>GSCHWANTLER, Michael |
| Comité d'Ethique UCL Saint-Luc<br>10 Avenue Hippocrate<br>UCL Saint Luc<br>Brussels 1200<br>Belgium                                           | HORSMANS, Yves                                            |
| Comité voor Medische Ethiek UZA<br>Wilrijkstraat 10                                                                                           | MICHIELSEN, Peter                                         |

Edegem 2650  
Belgium

Commissie Medische Ethiek UZ Gasthuisberg  
Herestraat 49  
Leuven 3000  
Belgium

NEVENS, Frederik

Academisch Ziekenhuis Vub Ethische Commissie  
Laarbeeklaan 101  
Brussels 1090  
Belgium

REYNAERT, Hendrik

Ethisch Comité Universitair Ziekenhuis Gent  
De Pintelaan 185  
Gent 9000  
Belgium

VAN VLIERBERGHE, Hans

Commissie Voor Ethiek AZ  
St. Jan AV  
Ruddershove 10  
BRUGGE 8000  
Belgium

ORLENT, Hans

Comite d'ethique ULB  
Hospital Erasme  
Route de Lennik 808  
Anderlecht 1070  
Belgium

MORENO, Christophe

H.-Hartziekenhuis Medisch-Ethische Commissie  
Wilgenstraat 2  
Roeselare 8800  
Belgium

DECAESTECKER, Jochen

Ottawa Hospital Research Ethics Board  
751 Parkdale Ave Suite 106  
Civic Campus  
Ottawa ON K1Y 1J7  
Canada

COOPER, Curtis

McGill University Health Centre Research Ethics Board  
1650, av. Cedar  
Montréal QC H3G 1A4  
Canada

GHALI, Maged Peter

Veritas IRB  
1255 Transcanada Hwy Suite

CÔTÉ, Pierre  
VEZINA, Sylvie

310 Dorval  
Montreal QC H9P 2V4  
Canada

Conjoint Health Research Ethics Board  
3330 Hospital Dr Nw Room 93  
Calgary AB T2N 4N1  
Canada

University Health Network Research Ethics Board  
700 University  
Toronto ON M5G 1Z5  
Canada

CPP Est I  
Faculte De Medecine  
BP 87900  
Dijon Cedex 21079  
France

Landesamt für Gesundheit und Soziales Berlin  
Geschäftsstelle der Ethik-Kommission des Landes Berlin  
Fehrbellinerplatz  
Berlin 10707  
Germany

Ethik-Kommission Der Medizinischen Fakultät Der Universität  
Würzburg  
Institut für Pharmakologie und Toxikologie  
Versbacher Strasse 9  
Würzburg 97087  
Germany

Ethikkommission Bei Der Landesärztekammer  
Baden-Württemberg  
Jahnstrasse 40  
Stuttgart 70597  
Germany

Ethik-Kommission Der Medizinischen Fakultät Der Universität  
Zu Köln  
Gleueler Str. 70  
Geb. 5, Eingang A, Etage 2A,  
Raum 015

MYERS, Rob

HEATHCOTE, Jenny  
FUNG, Scott

BENHAMOU, Yves  
BRONOWICKI, Jean Pierre  
GRANGE, Jean Didier  
HEZODE, Christophe  
LEBRAY, Pascal  
SERFATY, Lawrence  
TRAN, Albert  
ZARSKI, Jean Pierre  
ZOULIM, Fabien

ARASTÉH, Keikawus  
BERG, Thomas

KLINKER, Hartwig

TREIN, Andreas

GOESER, Tobias

Köln 50931  
Germany

Ethik-Kommission Der Medizinische Hochschule Hannover  
Carl-Neuberg-Strasse 1  
Hannover 30625  
Germany

MANNS, Michael Peter

Ethik-Kommission Der Ärztekammer Nordrhein  
Tersteegenstr 9  
Düsseldorf 40474  
Germany

MAUSS, Stefan

Ethik-Kommission Der Albert Ludwigs Universität Freiburg  
Engelbergerstr 21  
Freiburg 79106  
Germany

RASENACK, Jens

Ethik-Kommission des Fachbereichs Medizin der  
Johann-Wolfgang-Goethe Universität  
Theodor-Stern-Kai 7  
HAUS 1  
Frankfurt 60590  
Germany

ZEUZEM, Stefan

Ethik-Kommission der Aezrtekammer Hamburg  
Humboldtstr. 67a  
22083 Hamburg  
Germany

BUGGISCH, Peter

Charing Cross-Hospital Ethics Committee  
London - Bloomsbury  
Charing Cross Hospital,  
Room 4W/12, 4th Floor  
Fulham Palace Road  
London W6 8RF  
Great Britain

AGARWAL, Kaushik  
FOSTER, Graham R  
BROWN, Ashley  
CRAMP, Matthew

Helsinki Committee  
Rambam Medical Center  
Ha'aliyah Street Bat Gallm  
Haifa 31096  
Israel

BARUCH, Yaacov

Helsinki Committee  
Sourasky Medical Center  
6 Weitzman Street  
Tel Aviv 64239

LURIE, Yoav

Israel

Helsinki Committee  
Hadassah Medical Center  
Ein Carem  
Jerusalem 91120  
Israel

SHOUVAL, Daniel

Helsinki Committee  
Lady Davis Carmel Medical Center  
7 MICHAL STREET  
HAIFA 34362  
Israel

ZUCKERMAN, Elimelech

Helsinki Committee  
Rebecca Ziv Medical Center  
Darom Neighborhood  
Zefat 13000  
Israel

NIMER, Assy

Helsinki Committee  
Rabin Medical Center  
Kaplan Street  
Petah Tiqva 49100  
Israel

BEN-ARI, Ziv

Helsinki Committee  
Chaim Sheba Medical Center  
Tel Hashomer  
Ramat Gan 52621  
Israel

MAOR, Yaaov

Helsinki Committee  
Holy Family Medical Center  
Nazareth  
Israel

SAFADI, Rifaat

Multi Region Ethics Committee  
133 Molesworth Street  
Wellington  
New Zealand

STEDMAN, Catherine  
DICKSON, Graeme  
GANE, Ed

Reg. komite med. Og helsefaglig forskningsetikk  
Sør-Øst-Norge (REK Sør-Øst)  
**Post Address:** PO box 1130,  
Blindern, 0318 Oslo, Norway  
**Visit address:** Gullhaug torg  
4a, 0484 Oslo, Norway

VON DER LIPPE, Bent  
KONOPSKI, Zbigniew  
BLOCK HELLUM, Kjell  
FLORHOLMEN, Jon  
LANGELAND, Nina

Komisja Bioetyczna Uniwersytetu Medycznego w Białymstoku

Ul Kilinskiego 1  
Białystok 15-089  
Poland

Comissão de Ética para a Investigação Científica  
Parque de Saúde de Lisboa  
Avenida Do Brasil 53  
Pav. 17 - A  
Lisboa 1749-004  
Portugal

Independent Ethics Committee Of Smolensk Regional Clinical  
Hospital  
27 Gagarina Avenue  
Smolensk 214019  
Russia

Independent Ethics Committee Of Moscow  
Regional Clinical Institute Vladimirsky  
61/2 Schepkina Street  
Moscow 129111  
Russia

Interuniversity Ethics Committee And Association Of Medical  
And Pharmaceutical Institute Of Higher Education  
8 Build 2 Trubetskaya Str  
Moscow 119992  
Russia

Independent Interdisciplinary. Committee On Ethical  
Exploration of Clinical Studies  
51 Leningradsky Prospekt  
Moscow 125468  
Russia

The Scripps Clinic IRB  
11025 N. Torrey Pines Rd;  
La Jolla, CA 92037  
USA

Ochsner Institutional Review Board

FLISIAK, Robert  
HASSMANNPOZNANSKA,  
Elzbieta  
HORBAN, Andrzej  
HALOTA, Waldemar  
KRYCZKA, Wieslaw  
JABLKOWSKI, Maciej  
JANCZEWSKA-KAZEK, Ewa

PEIXE, Paula  
CALINAS, Antonio Filipe  
CARVALHO, Armando  
MACEDO, Guilherme  
SEREJO, Fatima

RAFALSKIY, Vladimir

BOGOMOLOV, Pavel

IVASHKIN, Vladimir

KOROCHKINA, Olga  
MOROZOV, Vyacheslav  
NIKITIN, Igor G  
YAKOVLEV, Alexey  
VORONIN, Evgeniy  
ZAKHAROVA, Natalia

POCKROS, Paul

GIRGRAH, Nigel

1514 Jefferson Hwy  
Biomedical Research Bldg.  
New Orleans LA 70121  
USA

IRB Of Cedars-Sinai Medical Center  
8383 Wilshire Blvd  
Suite 742  
Beverly Hills CA 90211  
USA

POORDAD, Fred

Committee On Human Rights  
New York Presbyterian Hospital  
Weill Medical College Of Cornell University  
407 East 61ST Street, RR-110  
New York NY 10065  
USA

JACOBSON, Ira M

Committee On The Protection Of The Rights Of Human Subjects  
School Of Medicine  
The University Of North Carolina At Chapel Hill  
Campus Box # 7097, Medical School Building # 52  
Chapel Hill NC 27599-7097  
USA

FRIED, Michael

University Of Chicago Office Of Clinical Research  
Section Regulatory Compliance  
5751 S Woodlawn Ave  
McGiffert Hall, 2nd floor  
Chicago IL 60637  
USA

JENSEN, Donald M

Sterling Institutional Review Board  
6300 Powers Ferry Rd, Suite 600-351  
Atlanta GA 30339  
USA

CHASEN, Richard  
DE JESUS, Edwin  
ETZKORN, Kyle  
JONAS, Mark  
LAWITZ, Eric  
SCHWARTZ, Howard  
STEIN, Ira  
TAUNK, Jawahar  
UNDERWOOD, James  
WRUBLE, Lawrence  
YOUNES, Ziad

North Mississippi Health Services IRB  
830 South Gloster Street East  
Tower 3Rd Floor  
Tupelo MS 38801, USA

PHILIPS, John
