# Supplementary material for: Fatigue during treatment for hepatitis C virus: results of self-reported fatigue severity in two Phase IIb studies of simeprevir treatment in patients with hepatitis C virus genotype 1 infection
Source: PubMed Central journal article supplement (PMC4162924; doi:10.1186/1471-2334-14-465), 2014-08-26
Supplement: 12879_2013_3786_MOESM2_ESM.pdf [file 12879_2013_3786_MOESM2_ESM.pdf]

**PILLAR\***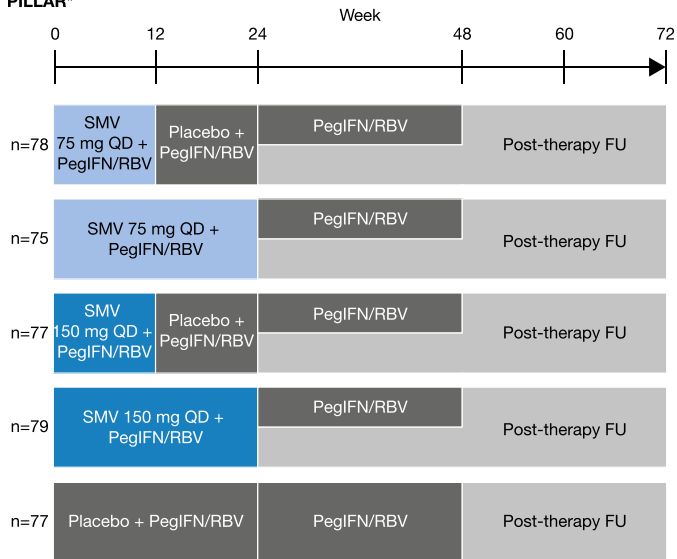**ASPIRE**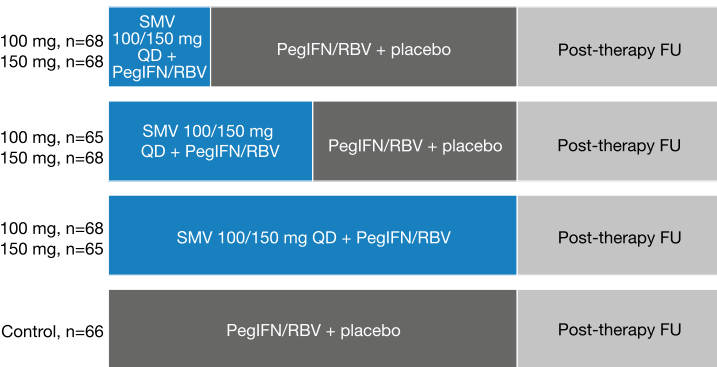

\*RGT criteria in SMV arms; end treatment at Week 24 if HCV RNA <25 IU/mL detectable/undetectable at Week 4 and <25 IU/mL undetectable at Weeks 12, 18 and 20 (all other patients continued PegIFN/RBV up to Week 48).

SMV, simeprevir; QD, once-daily; PegIFN/RBV, peginterferon- $\alpha$  and ribavirin; FU, follow-up; HCV, hepatitis C virus.
