# Supplementary material for: Fatigue during treatment for hepatitis C virus: results of self-reported fatigue severity in two Phase IIb studies of simeprevir treatment in patients with hepatitis C virus genotype 1 infection
Source: PubMed Central journal article supplement (PMC4162924; doi:10.1186/1471-2334-14-465), 2014-08-26
Supplement: 12879_2013_3786_MOESM3_ESM.pdf [file 12879_2013_3786_MOESM3_ESM.pdf]

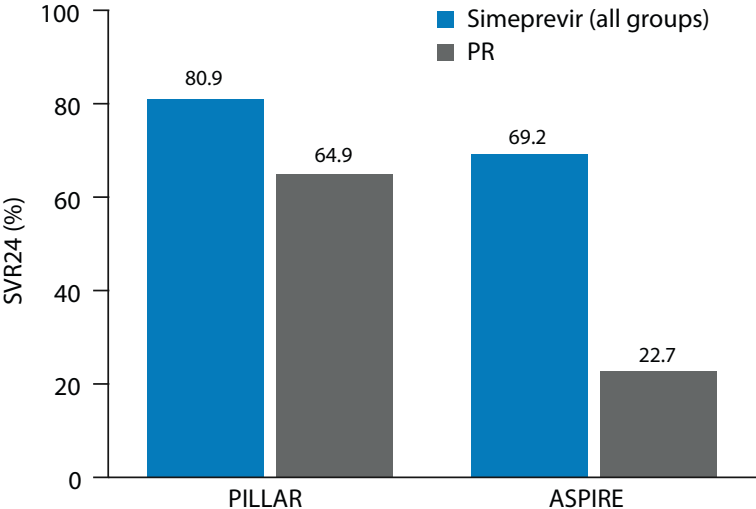

SVR24, sustained virological response defined as hepatitis C virus RNA < 25 IU/mL and undetectable at 24 weeks after planned end of treatment;  
PR, placebo/peginterferon- $\alpha$  and ribavirin
