# Supplementary material for: Fatigue during treatment for hepatitis C virus: results of self-reported fatigue severity in two Phase IIb studies of simeprevir treatment in patients with hepatitis C virus genotype 1 infection
Source: PubMed Central journal article supplement (PMC4162924; doi:10.1186/1471-2334-14-465), 2014-08-26
Supplement: 12879_2013_3786_MOESM5_ESM.pdf [file 12879_2013_3786_MOESM5_ESM.pdf]

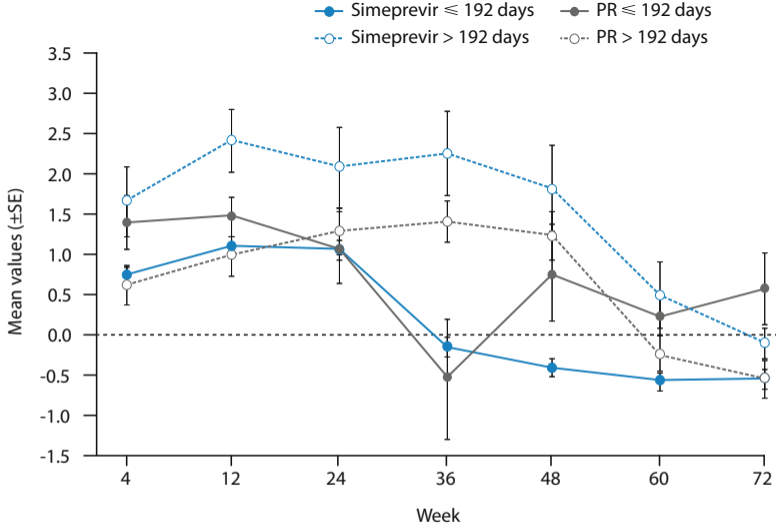

| Number of patients         |                                                           |
|----------------------------|-----------------------------------------------------------|
| Simeprevir $\leq$ 192 days | 170      171      158      157      150      150      150 |
| PR $\leq$ 192 days         | 10      8      9      8      6      7      6              |
| Simeprevir $>$ 192 days    | 15      16      16      15      16      14      14        |
| PR $>$ 192 days            | 39      38      39      37      37      36      38        |

PR, placebo/peginterferon- $\alpha$  and ribavirin
