# Supplementary material for: Fatigue during treatment for hepatitis C virus: results of self-reported fatigue severity in two Phase IIb studies of simeprevir treatment in patients with hepatitis C virus genotype 1 infection
Source: PubMed Central journal article supplement (PMC4162924; doi:10.1186/1471-2334-14-465), 2014-08-26
Supplement: 12879_2013_3786_MOESM6_ESM.pdf [file 12879_2013_3786_MOESM6_ESM.pdf]

a)

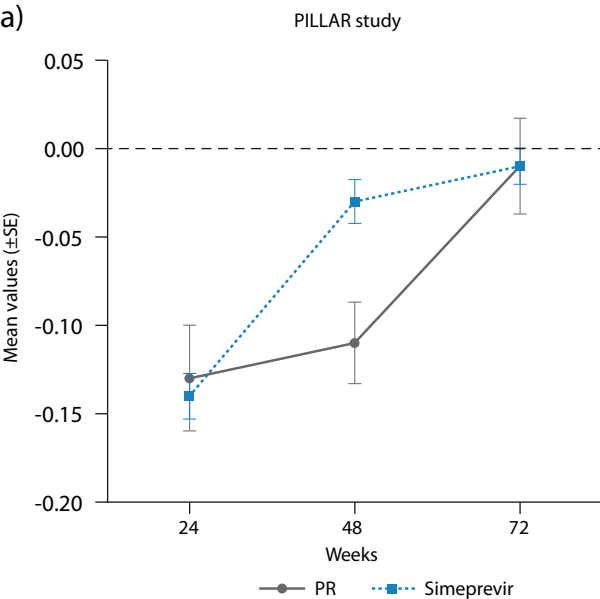

Number of patients

|            |     |     |     |
|------------|-----|-----|-----|
| PR         | 72  | 67  | 68  |
| Simeprevir | 279 | 268 | 275 |

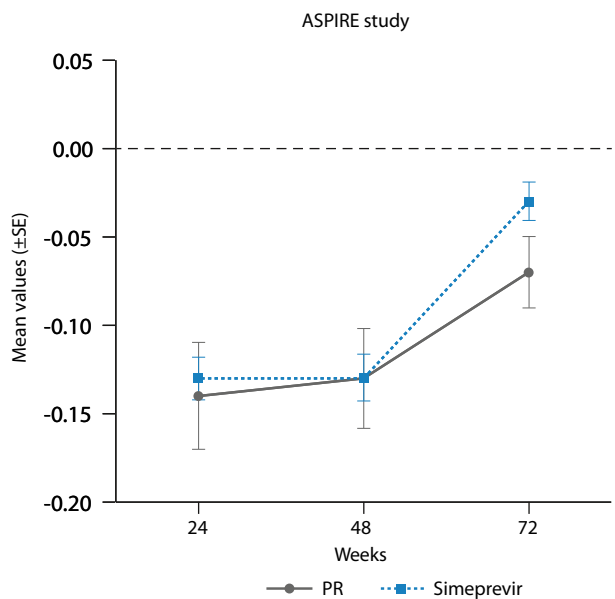

Number of patients

|            |     |     |     |
|------------|-----|-----|-----|
| PR         | 50  | 53  | 55  |
| Simeprevir | 344 | 342 | 330 |

b)

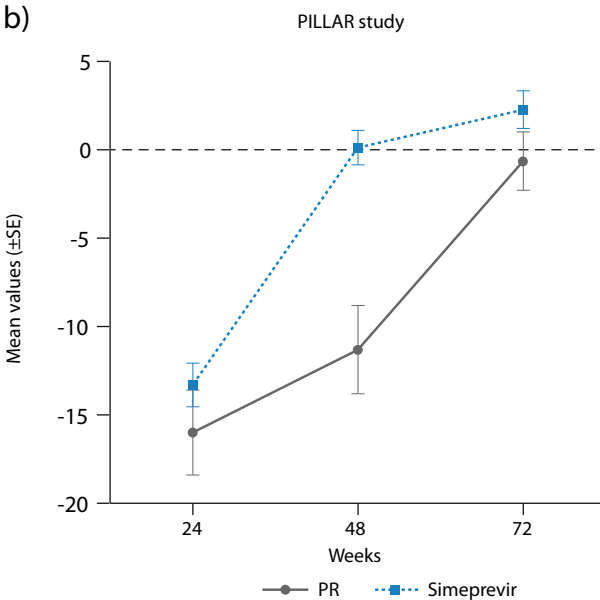

Number of patients

|            |     |     |     |
|------------|-----|-----|-----|
| PR         | 72  | 66  | 68  |
| Simeprevir | 275 | 269 | 274 |

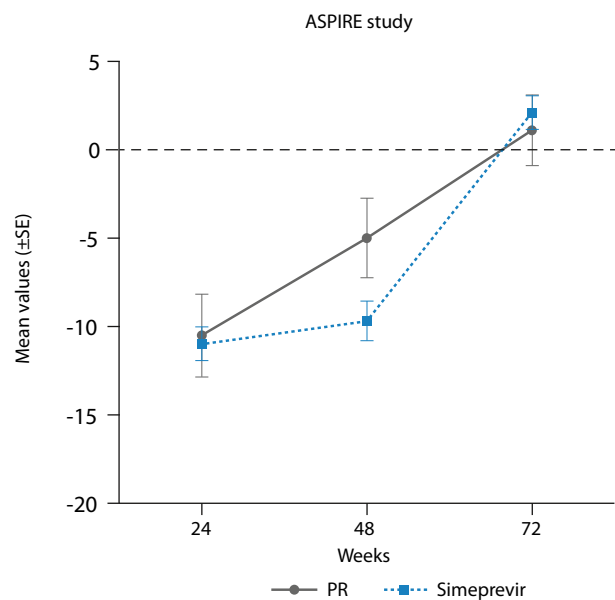

Number of patients

|            |     |     |     |
|------------|-----|-----|-----|
| PR         | 50  | 53  | 56  |
| Simeprevir | 342 | 341 | 331 |
