# Supplementary material for: Fatigue during treatment for hepatitis C virus: results of self-reported fatigue severity in two Phase IIb studies of simeprevir treatment in patients with hepatitis C virus genotype 1 infection
Source: PubMed Central journal article supplement (PMC4162924; doi:10.1186/1471-2334-14-465), 2014-08-26
Supplement: 12879_2013_3786_MOESM7_ESM.pdf [file 12879_2013_3786_MOESM7_ESM.pdf]

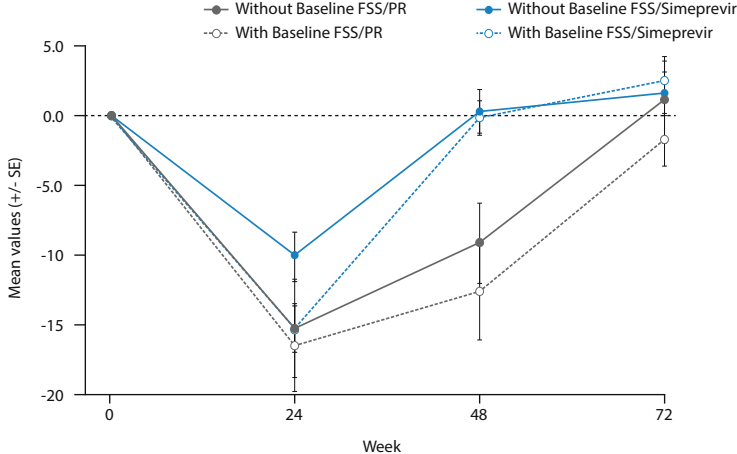

| Number of patients              |     |     |     |     |
|---------------------------------|-----|-----|-----|-----|
| Without Baseline FSS/PR         | 27  | 26  | 23  | 24  |
| Without Baseline FSS/Simeprevir | 112 | 102 | 100 | 102 |
| With Baseline FSS/PR            | 49  | 46  | 43  | 44  |
| With Baseline FSS/Simeprevir    | 193 | 173 | 169 | 172 |

PR, placebo/peginterferon- $\alpha$  and ribavirin
